# 1 Nuclear stabilisation of p53 requires a functional nucleolar 2 surveillance pathway

3

4 Katherine M. Hannan<sup>1,2,3</sup>, Priscilla Soo<sup>1</sup>, Mei S. Wong<sup>1,2,4§</sup>, Justine K. Lee<sup>5</sup>, Nadine Hein<sup>1</sup>, Maurits  
5 Evers<sup>1</sup>, Kira D. Wysoke<sup>1</sup>, Tobias D. Williams<sup>1§</sup>, Christian Montellese<sup>6</sup>, Lorey K. Smith<sup>2</sup>, Sheren J.  
6 Al-Obaidi<sup>1</sup>, Lorena Núñez-Villacís<sup>1</sup>, Perlita Poh<sup>1</sup>, Megan Pavy<sup>1</sup>, Jin-Shu He<sup>7</sup>, Kate M. Parsons<sup>7</sup>,  
7 Jeannine Diesch<sup>2§</sup>, Gaetan Burgio<sup>8</sup>, Rita Ferreira<sup>1</sup>, Zhi-Ping Feng<sup>8</sup>, Cathryn M. Gould<sup>9</sup>, Piyush B.  
8 Madhamshettiwar<sup>9</sup>, Johan Flygare<sup>10</sup>, Thomas J. Gonda<sup>11§</sup>, Kaylene J. Simpson<sup>4,9</sup>, Ulrike Kutay<sup>6</sup>,  
9 Richard B. Pearson<sup>1-4,12</sup>, Christoph Engel<sup>13</sup>, Nicholas J. Watkins<sup>5</sup>, Ross D. Hannan<sup>1-4,6,12,14\*#</sup> and  
10 Ameer J. George<sup>1,7,15#</sup>

11

12 **Affiliations:** <sup>1</sup>ACRF Department of Cancer Biology and Therapeutics, John Curtin School of  
13 Medical Research, Australian National University, Acton 2601 Australia; <sup>2</sup>Oncogenic Signalling  
14 and Growth Control Program, Peter MacCallum Cancer Centre, Melbourne 3000, Australia;  
15 <sup>3</sup>Department of Biochemistry and Molecular Biology, University of Melbourne, Parkville 3010  
16 Australia; <sup>4</sup>Sir Peter MacCallum Department of Oncology, University of Melbourne, Parkville 3010  
17 Australia; <sup>5</sup>Institute for Cell and Molecular Biosciences, Newcastle University, Newcastle-Upon-  
18 Tyne, UK; <sup>6</sup>Department of Biology, Institute of Biochemistry, ETH Zurich, Zurich, Switzerland;  
19 <sup>7</sup>ANU Centre for Therapeutic Discovery, John Curtin School of Medical Research, Australian  
20 National University, Acton 2601 Australia; <sup>8</sup>The John Curtin School of Medical Research,  
21 Australian National University, Acton 2601 Australia; <sup>9</sup>Victorian Centre for Functional Genomics,  
22 Peter MacCallum Cancer Centre, Melbourne 3000, Australia; <sup>10</sup>Lund Stem Cell Center, Lund  
23 University, BMC A12, Lund, Sweden; <sup>11</sup>School of Pharmacy, University of Queensland, Brisbane  
24 4102 Australia; <sup>12</sup>Department of Biochemistry and Molecular Biology, Monash University,  
25 Clayton, 3800, Australia; <sup>13</sup>Regensburg Center for Biochemistry, University of Regensburg, 93053

26 Regensburg, Germany; <sup>14</sup>School of Biomedical Sciences, University of Queensland, St Lucia 4067,  
27 Australia; <sup>15</sup>Department of Clinical Pathology, University of Melbourne, Parkville 3010 Australia.

28

29 <sup>§</sup> Denotes current address: Mei S. Wong: Faculty of Medicine, SEGi University, 47810 Petaling  
30 Jaya, Malaysia; Tobias D. Williams: Oncogenic Signalling and Growth Control Program, Peter  
31 MacCallum Cancer Centre, Melbourne 3000, Australia, Jeannine Diesch: Cancer and Leukaemia  
32 Epigenetics and Biology Program, Josep Carreras Leukaemia Research Institute (IJC), Campus  
33 ICO-GTP-UAB, Badalona, Spain, Thomas J. Gonda: University of South Australia Cancer  
34 Research Institute, Adelaide 5000 Australia. \*Denotes corresponding author; #denotes equal  
35 authorship.

36

37 **Corresponding Author:**

38 Professor Ross D. Hannan  
39 ACRF Department of Cancer Biology and Therapeutics  
40 The John Curtin School of Medical Research  
41 Australian National University  
42 Acton, 2601, Australia.

43 Email: [ross.hannan@anu.edu.au](mailto:ross.hannan@anu.edu.au)

44

45 **Keywords:** Nucleolar surveillance pathway, nucleolus, p53, ribosome biogenesis, high-throughput  
46 screening; ribosomal proteins, stress

47 **Abstract**

48 The nucleolar surveillance pathway (NSP) monitors nucleolar fidelity and responds to nucleolar  
49 stresses (i.e., inactivation of ribosome biogenesis) by mediating the inhibitory binding of ribosomal  
50 proteins (RPs) to mouse double minute 2 homolog (MDM2), a nuclear-localised E3 ubiquitin  
51 ligase, which results in p53 accumulation. Inappropriate activation of the NSP has been implicated  
52 in the pathogenesis of collection of human diseases termed “ribosomopathies”, while drugs that  
53 selectively activate the NSP are now in trials for cancer. Despite the clinical significance, the  
54 precise molecular mechanism(s) regulating the NSP remain poorly understood. Using genome-wide  
55 loss of function screens, we demonstrate the ribosome biogenesis (RiBi) axis as the most potent  
56 class of genes whose disruption stabilises p53. Furthermore, we identified a novel suite of genes  
57 critical for the NSP, including a novel mammalian protein implicated in 5S ribonucleoprotein  
58 particle (5S-RNP) biogenesis, HEATR3. By selectively disabling the NSP, we unexpectedly  
59 demonstrate that a functional NSP is required for the ability of all nuclear acting stresses tested,  
60 including DNA damage, to robustly induce p53 accumulation. Together, our data demonstrates that  
61 the NSP has evolved as the dominant central integrator of stresses that regulate nuclear p53  
62 abundance, thus ensuring RiBi is hardwired to cellular proliferative capacity.

63

## 64 **Main**

65 Mutations in the potent tumour suppressor protein p53 and its effector pathways occur in the  
66 majority of human cancers, and are therefore the subject of intense investigation. A key mechanism  
67 by which p53 is regulated is at the level of protein stabilisation, through the MDM2 protein, which  
68 induces ubiquitination, and subsequently proteasomal degradation of p53. DNA damage from  
69 ionising radiation or certain chemotherapeutic agents lead to the amino-terminal phosphorylation of  
70 p53, which prevents MDM2 binding, and results in p53 stabilisation. This triggers a number of anti-  
71 proliferative programs by activating or repressing key effector genes in a context-dependent  
72 manner<sup>1</sup>. The p53-MDM2 interaction is also antagonised by the tumour suppressor p14<sup>ARF</sup> in  
73 response to oncogenic challenges<sup>2</sup>. More recently, a third mechanism of p53 stabilisation has been  
74 identified; the NSP, which is activated by acute disruptions to RiBi, resulting in inhibitory binding  
75 of certain RPs to MDM2, thus leading to increased abundance of nuclear p53 protein<sup>3-5</sup>. In contrast  
76 to the former, the precise mechanisms underlying p53 stabilisation in response to the NSP are  
77 poorly understood. For example, the ribosomal proteins RPL5 and RPL11 have been implicated as  
78 the central regulators of the NSP through their participation in the 5S-RNP complex that binds to  
79 and inactivates MDM2 in response to nucleolar stress<sup>4,5</sup>. However, other RP and non-RP genes  
80 have also been implicated in regulating the NSP signalling process, suggesting the definitive  
81 mechanism is yet to be resolved. It is also unclear why loss or inactivation of only certain ribosome-  
82 associated genes give rise to increased p53 stabilisation or are connected with ribosomopathies.  
83 Finally, the functional relationship of the NSP to the mechanisms underlying p53 stabilisation  
84 observed in response to ‘classic’ non-nucleolar stress pathways, such as proteasomal stress, hypoxia  
85 or DNA damage, is not clear.

86

87 To address these questions, we first identified the entire repertoire of genes whose deletion activates  
88 stress pathways leading to stabilisation of p53 in A549 (human lung adenocarcinoma, p53 wild-  
89 type) cells, by undertaking a high-throughput genome-wide RNA interference (RNAi) imaging-

90 based screen measuring nuclear p53 accumulation using immunofluorescence ('p53 stabilisation  
91 screen', **Fig. 1a, Supplementary File 1**). The screen 'cut-off' was functionally defined as the  
92 minimum amount of p53 accumulation required to induce a significant cell-cycle defect  
93 (**Supplementary Fig. 1a-d**), which we identified as ~2-fold increase in p53 protein expression.  
94 Applying this cut-off ( $\log_2 \geq 1$ ) to the screening dataset, 827 genes fulfilled this criterion (defined as  
95 'p53 positive', **Fig. 1b**). We further interrogated the 'p53 positive' candidates to identify which  
96 molecular pathways/functions were enriched in the dataset using the KEGG network enrichment  
97 analysis feature of STRING<sup>6</sup> (**Fig. 1c**, annotated version in **Supplementary Fig. 2a &**  
98 **Supplementary File 2**). This revealed an enrichment of six major classes of genes including:  
99 ribosome, nucleolus, proteasome, RNA splicing, cell cycle and RNA Polymerase II (Pol II). These  
100 classes were also broadly confirmed by gene ontology (GO) analysis (**Fig. 1d, Supplementary File**  
101 **3**) and gene set enrichment analysis (GSEA, **Supplementary Fig. 2b**), resulting in GOs relating to  
102 RNP complex and RiBi, ribosomal RNA (rRNA) processing and rRNA metabolic processes being  
103 amongst the most significantly enriched. Moreover, intersecting our 'p53 positive' candidate list  
104 with the LOCATE subcellular localisation database<sup>7</sup>, we identified a significant over-representation  
105 of proteins localised to the nucleolus, nucleus and centrosome, and conversely, an under-  
106 representation of proteins located within the plasma membrane (**Fig. 1e, Supplementary File 4**).  
107 Collectively, these observations strongly support the notion that perturbations in RiBi and/or the  
108 nucleolus are a major, if not the most potent regulators of p53 accumulation.

109

110 We initially focussed specifically on RP genes given their prominence in the dataset; ~80% of the  
111 RPs screened were 'p53 positive' when depleted, including RP genes associated with Diamond-  
112 Blackfan Anaemia (DBA; e.g. *RPS19*, *RPL35A*, *RPS7*, *RPS10*, *RPS24*, *RPS26*, *RPL26*)<sup>8</sup> (**Fig. 2a**).  
113 In a complementary approach, we evaluated the RPs using a quantitative total p53 assay  
114 (Alphascreen) to verify p53 expression, and observed a significant correlation between the results  
115 from both techniques (**Fig. 2b, Supplementary Fig. 3a**). In total, 77.3% of the RPs specific to the

116 60S and 81.3% to the 40S ribosomal subunits, when depleted, induced a ‘p53 positive’ phenotype,  
117 implying that RPs to either subunit contributed similarly to the NSP p53 response. This finding is in  
118 contrast to a study reporting that the large subunit RPs have a more profound p53 response when  
119 depleted<sup>9</sup>, though an arbitrary 5-fold increase in p53 was implemented as a ‘cut off’ in that study,  
120 compared to our minimum physiologically relevant 2-fold cut off which was experimentally  
121 determined. Importantly, the differential ability of the RPs when depleted to elicit p53 stabilisation  
122 was not due to the inability of the siRNA to deplete the RP mRNA and protein (**Fig. 2c**,  
123 **Supplementary Fig. 3b**).

124

125 We further examined whether the ability of a RP to induce the NSP correlated with the degree to  
126 which its depletion affected ribosome subunit biogenesis and function. We measured the abundance  
127 of the 40S and 60S ribosomal subunits, and the levels of mature ribosomes (80S) bound to mRNAs  
128 in polysomes following RP depletion. Consistent with the prediction, depletion of RPL21, RPS18  
129 and RPS19, all of which induced robust stabilisation of p53, also robustly reduced the abundance of  
130 the corresponding 60S/40S subunit in which they are located, as well as the number of polysomes  
131 (**Fig. 2d & e**). In contrast, depletion of RPL22 and RPL28, which failed to induce p53 stabilisation,  
132 did not impact on 60S biogenesis, nor the number of polysomes compared to siNT (**Fig. 2d & e**).  
133 Exceptions to this were RPL5 and RPL11, whose knockdown failed to stabilise p53, even though  
134 60S biogenesis was ablated. This observation is consistent with studies implicating ‘free’ RPL5 and  
135 RPL11 (i.e., not incorporated into a 60S) as essential for the NSP due to their ability to bind MDM2  
136 as part of the 5S-RNP<sup>4,10-12</sup>.

137

138 We considered whether the location of a RP within the ribosome may predict their ability to disrupt  
139 ribosome assembly, and thus mediate p53 accumulation, upon depletion. To do this, we mapped the  
140 p53 intensity resulting from the knockdown of each RP onto the structure of the 60S and 40S  
141 subunits<sup>13</sup> (**Fig. 2f**). While RPS18 and RPS19 (corresponding to two of the highest p53 intensities

142 observed in the screen) co-located in the same region within the 40S subunit, there was no other  
143 clear evidence supporting that the specific location of a RP in the ribosome would increase p53  
144 stabilisation if depleted. Finally, we tested the hypothesis that RPs which integrate early into their  
145 respective ribosomal subunit (i.e., within the nucleolus) might be essential for the core structure,  
146 thus when depleted, would have the most profound effect on ribosome assembly and the NSP. By  
147 comparing p53 intensity and the published timing of integration of each RP into the ribosome<sup>14</sup>  
148 (**Supplementary File 5**), we demonstrated that the p53 levels were significantly higher following  
149 knockdown of those RPs which integrate into their respective subunits during early nucleolar stages  
150 of ribosome assembly (**Fig. 2g**). Thus, the ability of RPs to stabilise p53 correlated with their  
151 propensity to cause significant disruption to ribosome subunit assembly when depleted. This may  
152 explain, at least in part, why not all components of the ribosome, when mutated or deleted,  
153 contribute to ribosomopathies. For example, RPL22 and RPL28, which do not perturb ribosome  
154 subunit assembly when depleted, have not been associated with DBA to date.

155

156 Having identified the major classes of genes, including RPs, whose deletion leads to stabilisation of  
157 p53, we next determined the role of the NSP in this process; *a priori*, we predicted that only those  
158 genes directly involved in RiBi would be dependent on the NSP to stabilise p53 when depleted. To  
159 address this question, we took an unbiased approach to identify the key components of NSP that can  
160 be targeted to inactivate NSP-mediated p53 stabilisation. Accordingly, we performed a genome-  
161 wide RNAi screen to determine the genes whose depletion suppressed p53 accumulation in  
162 response to nucleolar stress induced by knockdown of RPS19, the prototypical DBA gene known to  
163 induce NSP when depleted<sup>15-17</sup> (termed ‘modifiers of ribosomal stress’ screen; **Fig. 3a &**  
164 **Supplementary File 6**). Using a cut-off for normalised p53 intensity of up to and including 0.5  
165 ( $\log_2 = -1$ , calculated based on 3 standard deviations (SD) above the positive control,  
166 siTP53+siRPS19), we identified 64 genes essential for a functional NSP (**Fig. 3a &**  
167 **Supplementary Fig. 4a**). We rescreened these 64 candidates (outlined in Methods), to identify

168 candidates which recapitulated the primary screen phenotype (i.e. suppressed p53 response when  
169 co-depleted with siRPS19) with two or more siRNA duplexes. Critically, in addition to TP53, both  
170 RPL5 and RPL11 were the top ranked candidates which, when depleted, reduced p53 accumulation  
171 in response to NSP activation, while no other RPs reached this cut-off. This observation is in  
172 contrast to previous reports suggesting a variety of RPs regulate p53 stability (e.g. RPL23<sup>18,19</sup>,  
173 RPL26<sup>20,21</sup>, RPS3<sup>22</sup>, RPS7<sup>23</sup>, RPS14<sup>24</sup>, RPS25<sup>25</sup>, RPS27A<sup>26</sup>, RPS27 and RPS27L<sup>27</sup>, RPS15, RPS20  
174 and RPL37<sup>28</sup>). Our study, therefore, functionally defines RPL5 and RPL11 as the only RPs essential  
175 for the NSP, consistent with their proposed role in the 5S-RNP interaction with MDM2. Similarly,  
176 non-RP factors previously reported to be linked to RiBi and p53 activity (e.g. SRSF1, GLTSCR2  
177 (PICT1), HEXIM1, MYBBP1A, RRP8 (NML) and NPM1<sup>29-34</sup>) were not identified as high-ranking  
178 candidates, suggesting, at least in this system under the kinetics used for the assays, they are not  
179 essential for NSP-induced stabilisation of p53 and/or may play tissue or developmentally-specific  
180 roles in the NSP.

181

182 In addition to TP53, RPL5 and RPL11, we further validated a selection of candidates from the  
183 screen including HEATR3, RXRA and CIRH1A as *bone fide* modulators of the p53 response (**Fig.**  
184 **3b, Supplementary Fig. 4a, c-h & i-n**). HEATR3 (HEAT-repeat containing 3) was of significant  
185 interest as a novel direct regulator of the NSP and the 5S-RNP-MDM2 axis, as bioinformatic  
186 domain alignment suggested that HEATR3 is a human homolog of yeast symportin 1 (Syo1)  
187 protein, which enables import of rpL5 and rpL11 into the nucleus of *Saccharomyces cerevisiae*<sup>35,36</sup>,  
188 and acts as a scaffold for 5S-RNP biogenesis prior to incorporation into the pre-60S ribosomal  
189 subunit<sup>35</sup>. To analyse any structural similarities between the human and yeast proteins, we modelled  
190 the HEATR3 structure based on the *Chaetomium thermophilium* Syo1 (ctSyo1) crystal structure<sup>36</sup>  
191 using ‘Modeller’ (**Fig. 4a & Supplementary Fig. 5**), which indicates the potential for RPL5 and  
192 RPL11 binding on opposite sides of the HEAT repeats similar to that shown for ctSyo1<sup>35,36</sup>. In  
193 support of this model, co-immunoprecipitation experiments from A549 cells co-transfected with



194 myc-tagged HEATR3 (MT-HEATR3) and either FLAG-tagged RPL5 or RPL11 confirmed that  
195 RPL11 and RPL5 bind to HEATR3 *in situ* (**Fig. 4b**). Moreover, depletion of HEATR3 partially  
196 phenocopied RPL5 and RPL11 knockdown, resulting in a marked reduction in 60S subunit  
197 production (**Fig. 4c**), the number of polysomes (**Fig. 4d**) and 5S-RNP binding to MDM2 (**Fig. 4e &**  
198 **f**). The reduced efficacy of HEATR3 depletion to disrupt RiBi and NSP compared to RPL5 and  
199 RPL11 suggests there may also be HEATR3-independent pathways by which RPL5 and RPL11 can  
200 assemble into 5S-RNP. Even so, *in toto*, these findings strongly suggest that HEATR3 is a  
201 functional homolog of Syo1 and important for 60S assembly and NSP in human cells through its  
202 ability to interact with the 5S-RNP (**Fig. 4g**).

203

204 Having functionally defined RPL5, RPL11 and HEATR3 as direct regulators of the NSP, we next  
205 used their depletion (RNAi) to determine how important a functional NSP is for stabilisation of p53  
206 by stresses not traditionally implicated in RiBi. To do this, a representative selection of the 827  
207 genes identified as ‘p53 positive’ (i.e., whose depletion increased p53 levels; **Fig. 1b&c**; 232 genes  
208 representing nucleolar, ribosome, splicing, Pol II, proteasome, cell cycle and other gene classes)  
209 were rescreened to determine if their ability to stabilise p53 when depleted was dependent on the  
210 NSP (**Fig. 5 & Supplementary File 7**). As expected, the ability of RP and other nucleolar/RiBi-  
211 related genes to robustly activate p53 when depleted was blocked when the NSP was inactivated by  
212 co-depletion of either RPL5, RPL11 or HEATR3. Notably, the overall effect of HEATR3 depletion  
213 to reduce p53 accumulation was less profound than RPL5 and RPL11 depletion, and for a subset of  
214 large RNPs, HEATR3 depletion completely failed to block induction of p53 (**Fig. 5a&b,**  
215 **Supplementary File 7**). Thus, HEATR3 is necessary for 5S-RNP-MDM2 complex assembly in  
216 response to the disruption of many (but not all) RiBi proteins, consistent with the observations  
217 above that HEATR3-independent pathways by which RPL5 and RPL11 can assemble into 5S-RNP  
218 may exist.

219

220 Critically, and unexpectedly, the ability of major classes of genes not traditionally associated with  
221 the ribosome or the nucleolus (e.g., RNA splicing, cell cycle and Pol II, **Fig.1c**) to stabilise p53  
222 following their depletion was also ablated upon co-knockdown of RPL5 or RPL11, and to a lesser  
223 degree HEATR3 (**Fig. 5a & b, Supplementary File 7**). The p53 suppression was not simply due to  
224 reduced ribosome assembly (and therefore reduced p53 mRNA translation) as a consequence of  
225 RPL5 or RPL11 depletion (**Fig. 4c & d**), because co-depletion of RPS19 failed to blunt p53  
226 accumulation, despite RPS19 depletion causing a similar defect in ribosomal subunit assembly and  
227 polysomes (**Fig. 2d & e**). Together, these data suggest the NSP is required for robust stabilisation of  
228 p53 in response to the dysregulation of a large number of eukaryotic genes and cellular processes  
229 that are not traditionally associated with RiBi.

230

231 Given these unexpected findings, we extended these studies to determine the requirement of a  
232 functional NSP to mediate stabilisation of p53 in response to a broad range of pharmacological  
233 agents and pathophysiologic stressors, including inhibitors of Pol I & II, nucleic acid synthesis  
234 inhibitors, agents that induce DNA damage, nuclear export inhibitors and proteotoxic stress.  
235 Intriguingly, inactivation of the NSP by either RPL5 or RPL11 depletion ablated the ability of Pol  
236 I/II inhibitors, nucleic acid synthesis inhibitors and all classes of DNA damage-inducing agents to  
237 stabilise p53. In contrast, the ability of proteotoxic stresses including proteasomal inhibitors,  
238 nuclear transport inhibitors and heat shock to increase p53 levels were only moderately, or not at all  
239 blunted by inactivation of the NSP (**Fig. 5c & Supplementary Fig. 6b**). We also confirmed these  
240 findings using a high-content screening-based approach (**Supplementary Fig. 6c**), where HEATR3  
241 depletion also blunted the response, however, not as efficiently as RPL5/L11 depletion. We noted  
242 that knockdown of RPL5 was consistently more potent at blocking the NSP compared to RPL11 or  
243 HEATR3, suggesting RPL5 may modulate p53 by mechanisms in addition to inhibitory binding of  
244 5S-RNP to MDM2. Consistent with this, we observed that knockdown of RPL5 but not RPL11

245 significantly reduced p53 mRNA levels (**Supplementary Fig. 6d**), although the mechanism of this  
246 reduction was not investigated further.

247

248 To further validate our results in a model of NSP inactivation (other than RPL5 and RPL11  
249 depletion), we used embryonic fibroblasts (MEFs) isolated from mice harbouring the Mdm2<sup>C305F</sup>  
250 mutation, which disrupts RPL5 and RPL11 (ergo 5S-RNP) binding to MDM2, thereby inactivating  
251 the NSP<sup>4,12</sup>. We again tested a complement of nuclear and physiological stressors (**Fig. 5d &**  
252 **Supplementary Fig. 6e**) in these cells. Consistent with RPL5/RPL11 knockdown, the Mdm2<sup>C305F</sup>  
253 mutation prevented the p53 response upon exposure to Pol I/II inhibitors, nucleic acid synthesis  
254 inhibitors and all classes of DNA damage inducing agents, but not proteotoxic stress. Taken  
255 together, the data indicates that an intact NSP is required for the stabilisation of p53 in response to a  
256 broad range of cellular stresses, not just ribosomal/nucleolar stress. Notably, the quantitative effect  
257 of Mdm2<sup>C305F</sup> mutation to blunt p53 accumulation in response to stress more closely reflected the  
258 effect of RPL11 depletion than RPL5 depletion, consistent with the conclusions above that RPL5  
259 may modulate p53 by mechanisms in addition to inhibitory binding of 5S-RNP to MDM2.

260

261 In summary, using global screening approaches, we have identified the complement of genes and  
262 pathways functionally required for stabilisation of p53 in response to the canonical NSP. Our data  
263 definitively demonstrate that RPL5 and RPL11 do not induce p53 stabilisation when depleted, and  
264 are the only RPs essential for functional NSP to stabilise p53<sup>4,12,37</sup>. Furthermore, we demonstrate  
265 that one of the top hits, HEATR3, is a potential ribosome assembly factor required for mammalian  
266 60S ribosomal subunit assembly through binding of RPL5 and RPL11. Consistent with an essential  
267 role for HEATR3 in NSP-mediated stabilisation of p53, HEATR3 depletion leads to reduced  
268 association of the 5S-RNP with MDM2.

269

270 Critically, by inactivating the NSP, we demonstrate that pharmacological agents and  
271 pathophysiological conditions leading to genotoxic stress, as well as the majority of genes whose  
272 loss-of-function stabilises p53, do so in an NSP-dependent fashion. Our data provides experimental  
273 support to Rubbi and Milner's original hypothesis that the nucleolus, through the NSP, is a  
274 universal stress sensor responsible for p53 homeostasis within cells<sup>38</sup>. Thus, we conclude that the  
275 well-described mechanisms of genotoxic stress which induce extensive post-translational regulation  
276 of p53, thereby modulating its interaction with MDM2, are insufficient in the absence of a  
277 functioning NSP to robustly stabilise p53. The exception to this rule appears to be pathological  
278 conditions and pharmacologic agents that result in proteasomal stress, which stabilise p53 largely  
279 independently of the NSP. This is consistent with MDM2-mediated degradation of p53 being  
280 dependent on a functioning proteasome to degrade ubiquitinated p53.

281

282 The differential ability of ribosome components to induce p53 stabilisation following their  
283 depletion correlated directly with the degree of disruption of RiBi and ribosome assembly. By  
284 extrapolation, we propose that all nuclear acting- pathological conditions, -pharmacologic agents or  
285 genetic inactivating lesions stabilise p53 in a 5S-RNP-MDM2 dependent fashion, through  
286 disruption of RiBi. Consistent with this, ribosomal DNA (rDNA) is highly sensitive to DNA  
287 damage (a single lesion in the rDNA is sufficient to cause cell cycle arrest<sup>39</sup>), and most cytotoxic  
288 drugs and pathologic conditions that induce DNA damage have been reported to cause defects in  
289 RiBi. We propose that the nucleolus functions as the cellular equivalent of a sentinel or "canary in  
290 the coal mine" to detect a broad range of cellular stresses and mediate stabilisation of p53. In this  
291 model, the nucleolus acts a sensitivity gauge, whereby stresses such as DNA damage can only  
292 stabilise p53 if the stress is of sufficient magnitude to perturb RiBi/nucleolar function, thereby  
293 preventing minor cellular insults from inappropriately inhibiting proliferation. Given that RiBi is  
294 the most energy-expensive process a cell undertakes, the evolution of such a mechanism also  
295 ensures RiBi remains hardwired to proliferative capacity through p53 activity.

296

297 Finally, due to the central role RiBi and the NSP plays in the regulation of p53, we suggest a  
298 paradigm-shift in thinking is required for how this axis contributes to cancer pathogenesis. Due to  
299 the pervasive stress tumour cells are exposed to, we propose that overcoming NSP-induced p53  
300 activation is likely to be a very frequent step in malignant transformation. Indeed, RP genes are  
301 hemizyously deleted in 43% of human cancers, and almost always in concert with *TP53*  
302 mutations, while such RP deletions are infrequent in *TP53*-intact tumours<sup>40,41</sup>. This is consistent  
303 with chronic activation of the NSP in response to RP deletion being incompatible with malignant  
304 transformation and negatively selected for unless p53 is inactivated.

## 305 **Acknowledgements**

306

307 Thanks to the Captain Courageous Foundation ([captaincourageous.com.au](http://captaincourageous.com.au)) in particular, Jessica  
308 and Jeff Bond, and Bill Steele for their ongoing support and funding for this project. We would like  
309 to acknowledge the founding and current members of the Australian Diamond Blackfan Anaemia  
310 (ADBA) program, consisting of Sheren J. Al-Obaidi, Luen Bik To, Sarah C.E. Bray, Richard J.  
311 D'Andrea, Jianmin Ding, Ameer J. George, Thomas J. Gonda, Ross D. Hannan, Melissa Ilsley, S.  
312 Peter Klinken, Lorena Núñez-Villacís, Richard B. Pearson, Ben Saxon, Hamish S. Scott, Adam  
313 Stephenson, Adam Stevenson, Parvathy Venugopal, Amilia Wee, Louise N. Winteringham and Mei  
314 Szin Wong. Our sincerest thanks go to Yanping Zhang (UNC Chapel Hill, USA) for providing the  
315 Mdm2 mouse strain used in this work. We would also like to thank George Thomas (IDIBELL,  
316 Spain) for his valuable discussions.

317

318 We would like to thank the Imaging and Cytometry Facility (Dr Harpreet Vohra and Mr Michael  
319 Devoy), the ANU Bioinformatics Consultancy (Dr Zhi-Ping Feng and Mr Cameron Jack), and the  
320 staff at the Australian Phenomics Facility, the ACRF Biomolecular Resource Facility and the ANU  
321 Centre for Therapeutic Discovery at the John Curtin School of Medical Research at the Australian  
322 National University for their assistance. We would also like to thank the ACRF Victorian Centre for  
323 Functional Genomics (Ms Jennii Luu and Mr Daniel Thomas), the Molecular Genomics Core (Dr  
324 Gisela Mir Arneau and Ms Aga Borcz), the Bioinformatics Core (Mr Jason Ellul) and the Advanced  
325 Centre for Cancer Cell Isolation and Flow Cytometry (Ms Viki Milovac and Ms Sophie Curcio)  
326 located at the Peter MacCallum Cancer Centre for their technical assistance, and all members of the  
327 Engel lab, especially Philipp Becker and Mona Höcherl.

328

329 This work was supported by funding from the Captain Courageous Foundation and the National  
330 Health and Medical Research Council (NHMRC) of Australia (Project Grants #1100654, #1158732,

331 #1102609, Program Grant #1053792 and Senior Research Fellowships to R.D.H (#1116999) and  
332 R.B.P (#1058586). C.E. is supported by the ‘Emmy-Noether-Programme’, DFG grant no. EN  
333 1204/1-1. U.K. was supported by the Swiss National Science Foundation (SNSF) (grant  
334 31003A\_166565 and the NCCR ‘RNA and disease’). N.J.W is supported by funding from the  
335 DBAF, DBA UK and the BBSRC (BB/R00143X/1). A.J.G is supported by a Captain Courageous  
336 Foundation Fellowship.

337

338 The Victorian Centre for Functional Genomics (K.J.S.) is funded by the Australian Cancer  
339 Research Foundation (ACRF) and Phenomics Australia, through funding from the Australian  
340 Government’s National Collaborative Research Infrastructure Strategy (NCRIS) program and the  
341 Peter MacCallum Cancer Centre Foundation. The ANU Centre for Therapeutic Discovery (A.J.G)  
342 is funded by the ACRF, Australian National University and ACT Health.

343

## 344 **Author Contributions**

345

346 K.M.H, R.D.H and A.J.G conceived and designed the study and wrote the manuscript; all other  
347 authors have reviewed and edited the manuscript. K.J.S, R.D.H and A.J.G. designed the high-  
348 throughput screening approaches utilised in this study. A.J.G, P.S, J.H and K.M.P. performed the  
349 high-throughput screens/high-content imaging assays and developed the image analysis pipelines.  
350 M.E., L.K.S, Z-P.F, C.M.G, P.B.M, K.J.S and A.J.G performed the analysis and visualisation of  
351 screening data. M.S.W. and A.J.G designed and executed the validation of screening candidates and  
352 HEATR3 co-immunoprecipitation analysis. J.K.L and N.J.W. performed the co-  
353 immunoprecipitation analysis of 5S rRNA with MDM2. C.M., U.K and A.J.G performed the  
354 ribosome shading and assembly analyses. C.E. performed the HEATR3/Syo1 sequence alignments  
355 and predictive modelling. K.M.H., P.S, M.S.W, T.D.H, and P.P. performed the ribosomal subunit  
356 and polysomal analyses. P.S, M.S.W, N.H, K.D.W, T.D.W, S.J.A, L.N.V, P.P, M.P, G.B, R.F and

357 A.J.G performed the molecular biology and biochemical experiments. J.F, T.J.G., K.J.S, U.K.,  
358 R.B.P., N.J.W., R.D.H. and A.J.G. contributed valuable interpretation and academic discussion.  
359 R.D.H. and A.J.G. co-supervised the project.

360

361

362 **Disclosure Statement**

363

364 R.D.H is a Chief Scientific Advisor of Pimera, Inc. (San Diego, CA). All other authors have no  
365 disclosures to report.

366



## 367 **References**

368

- 369 1 Zilfou, J. T. & Lowe, S. W. Tumor suppressive functions of p53. *Cold Spring Harb*  
370 *Perspect Biol* **1**, a001883, doi:10.1101/cshperspect.a001883 (2009).
- 371 2 Dai, M. S. *et al.* Physical and functional interaction between ribosomal protein L11 and the  
372 tumor suppressor ARF. *J Biol Chem* **287**, 17120-17129, doi:10.1074/jbc.M111.311902  
373 (2012).
- 374 3 Boulon, S., Westman, B. J., Hutten, S., Boisvert, F. M. & Lamond, A. I. The nucleolus  
375 under stress. *Mol Cell* **40**, 216-227, doi:10.1016/j.molcel.2010.09.024 (2010).
- 376 4 Sloan, K. E., Bohnsack, M. T. & Watkins, N. J. The 5S RNP couples p53 homeostasis to  
377 ribosome biogenesis and nucleolar stress. *Cell Rep* **5**, 237-247,  
378 doi:10.1016/j.celrep.2013.08.049 (2013).
- 379 5 Donati, G., Peddigari, S., Mercer, C. A. & Thomas, G. 5S ribosomal RNA is an essential  
380 component of a nascent ribosomal precursor complex that regulates the Hdm2-p53  
381 checkpoint. *Cell Rep* **4**, 87-98, doi:10.1016/j.celrep.2013.05.045 (2013).
- 382 6 von Mering, C. *et al.* STRING: a database of predicted functional associations between  
383 proteins. *Nucleic Acids Res* **31**, 258-261, doi:10.1093/nar/gkg034 (2003).
- 384 7 Sprenger, J. *et al.* LOCATE: a mammalian protein subcellular localization database. *Nucleic*  
385 *Acids Res* **36**, D230-233, doi:10.1093/nar/gkm950 (2008).
- 386 8 Ulirsch, J. C. *et al.* The Genetic Landscape of Diamond-Blackfan Anemia. *Am J Hum Genet*  
387 **103**, 930-947, doi:10.1016/j.ajhg.2018.10.027 (2018).
- 388 9 Nicolas, E. *et al.* Involvement of human ribosomal proteins in nucleolar structure and p53-  
389 dependent nucleolar stress. *Nat Commun* **7**, 11390, doi:10.1038/ncomms11390 (2016).
- 390 10 Bursac, S. *et al.* Mutual protection of ribosomal proteins L5 and L11 from degradation is  
391 essential for p53 activation upon ribosomal biogenesis stress. *Proc Natl Acad Sci U S A* **109**,  
392 20467-20472, doi:10.1073/pnas.1218535109 (2012).

- 393 11 Fumagalli, S., Ivanenkov, V. V., Teng, T. & Thomas, G. Suprainduction of p53 by  
394 disruption of 40S and 60S ribosome biogenesis leads to the activation of a novel G2/M  
395 checkpoint. *Genes Dev* **26**, 1028-1040, doi:10.1101/gad.189951.112 (2012).
- 396 12 Macias, E. *et al.* An ARF-independent c-MYC-activated tumor suppression pathway  
397 mediated by ribosomal protein-Mdm2 Interaction. *Cancer Cell* **18**, 231-243,  
398 doi:10.1016/j.ccr.2010.08.007 (2010).
- 399 13 Khatter, H., Myasnikov, A. G., Natchiar, S. K. & Klaholz, B. P. Structure of the human 80S  
400 ribosome. *Nature* **520**, 640-645, doi:10.1038/nature14427 (2015).
- 401 14 de la Cruz, J., Karbstein, K. & Woolford, J. L., Jr. Functions of ribosomal proteins in  
402 assembly of eukaryotic ribosomes in vivo. *Annu Rev Biochem* **84**, 93-129,  
403 doi:10.1146/annurev-biochem-060614-033917 (2015).
- 404 15 Jaako, P. *et al.* Disruption of the 5S RNP-Mdm2 interaction significantly improves the  
405 erythroid defect in a mouse model for Diamond-Blackfan anemia. *Leukemia* **29**, 2221-2229,  
406 doi:10.1038/leu.2015.128 (2015).
- 407 16 Jaako, P. *et al.* Mice with ribosomal protein S19 deficiency develop bone marrow failure  
408 and symptoms like patients with Diamond-Blackfan anemia. *Blood* **118**, 6087-6096,  
409 doi:10.1182/blood-2011-08-371963 (2011).
- 410 17 Sjogren, S. E. *et al.* Glucocorticoids improve erythroid progenitor maintenance and dampen  
411 Trp53 response in a mouse model of Diamond-Blackfan anaemia. *Br J Haematol* **171**, 517-  
412 529, doi:10.1111/bjh.13632 (2015).
- 413 18 Dai, M. S. *et al.* Ribosomal protein L23 activates p53 by inhibiting MDM2 function in  
414 response to ribosomal perturbation but not to translation inhibition. *Mol Cell Biol* **24**, 7654-  
415 7668, doi:10.1128/MCB.24.17.7654-7668.2004 (2004).
- 416 19 Jin, A., Itahana, K., O'Keefe, K. & Zhang, Y. Inhibition of HDM2 and activation of p53 by  
417 ribosomal protein L23. *Mol Cell Biol* **24**, 7669-7680, doi:10.1128/MCB.24.17.7669-  
418 7680.2004 (2004).

- 419 20 Ofir-Rosenfeld, Y., Boggs, K., Michael, D., Kastan, M. B. & Oren, M. Mdm2 regulates p53  
420 mRNA translation through inhibitory interactions with ribosomal protein L26. *Mol Cell* **32**,  
421 180-189, doi:10.1016/j.molcel.2008.08.031 (2008).
- 422 21 Zhang, Y. *et al.* Negative regulation of HDM2 to attenuate p53 degradation by ribosomal  
423 protein L26. *Nucleic Acids Res* **38**, 6544-6554, doi:10.1093/nar/gkq536 (2010).
- 424 22 Yadavilli, S. *et al.* Ribosomal protein S3: A multi-functional protein that interacts with both  
425 p53 and MDM2 through its KH domain. *DNA Repair (Amst)* **8**, 1215-1224,  
426 doi:10.1016/j.dnarep.2009.07.003 (2009).
- 427 23 Chen, D. *et al.* Ribosomal protein S7 as a novel modulator of p53-MDM2 interaction:  
428 binding to MDM2, stabilization of p53 protein, and activation of p53 function. *Oncogene*  
429 **26**, 5029-5037, doi:10.1038/sj.onc.1210327 (2007).
- 430 24 Zhou, X., Hao, Q., Liao, J., Zhang, Q. & Lu, H. Ribosomal protein S14 unties the MDM2-  
431 p53 loop upon ribosomal stress. *Oncogene* **32**, 388-396, doi:10.1038/onc.2012.63 (2013).
- 432 25 Zhang, X. *et al.* Identification of ribosomal protein S25 (RPS25)-MDM2-p53 regulatory  
433 feedback loop. *Oncogene* **32**, 2782-2791, doi:10.1038/onc.2012.289 (2013).
- 434 26 Sun, X. X., DeVine, T., Challagundla, K. B. & Dai, M. S. Interplay between ribosomal  
435 protein S27a and MDM2 protein in p53 activation in response to ribosomal stress. *J Biol*  
436 *Chem* **286**, 22730-22741, doi:10.1074/jbc.M111.223651 (2011).
- 437 27 Xiong, X., Zhao, Y., He, H. & Sun, Y. Ribosomal protein S27-like and S27 interplay with  
438 p53-MDM2 axis as a target, a substrate and a regulator. *Oncogene* **30**, 1798-1811,  
439 doi:10.1038/onc.2010.569 (2011).
- 440 28 Daftuar, L., Zhu, Y., Jacq, X. & Prives, C. Ribosomal proteins RPL37, RPS15 and RPS20  
441 regulate the Mdm2-p53-MdmX network. *PLoS One* **8**, e68667,  
442 doi:10.1371/journal.pone.0068667 (2013).

- 443 29 Fregoso, O. I., Das, S., Akerman, M. & Krainer, A. R. Splicing-factor oncoprotein SRSF1  
444 stabilizes p53 via RPL5 and induces cellular senescence. *Mol Cell* **50**, 56-66,  
445 doi:10.1016/j.molcel.2013.02.001 (2013).
- 446 30 Kumazawa, T. *et al.* Novel nucleolar pathway connecting intracellular energy status with  
447 p53 activation. *J Biol Chem* **286**, 20861-20869, doi:10.1074/jbc.M110.209916 (2011).
- 448 31 Kuroda, T. *et al.* RNA content in the nucleolus alters p53 acetylation via MYBBP1A.  
449 *EMBO J* **30**, 1054-1066, doi:10.1038/emboj.2011.23 (2011).
- 450 32 Lew, Q. J. *et al.* Identification of HEXIM1 as a positive regulator of p53. *J Biol Chem* **287**,  
451 36443-36454, doi:10.1074/jbc.M112.374157 (2012).
- 452 33 Sasaki, M. *et al.* Regulation of the MDM2-P53 pathway and tumor growth by PICT1 via  
453 nucleolar RPL11. *Nat Med* **17**, 944-951, doi:10.1038/nm.2392 (2011).
- 454 34 Lindstrom, M. S. NPM1/B23: A Multifunctional Chaperone in Ribosome Biogenesis and  
455 Chromatin Remodeling. *Biochem Res Int* **2011**, 195209, doi:10.1155/2011/195209 (2011).
- 456 35 Calvino, F. R. *et al.* Symportin 1 chaperones 5S RNP assembly during ribosome biogenesis  
457 by occupying an essential rRNA-binding site. *Nat Commun* **6**, 6510,  
458 doi:10.1038/ncomms7510 (2015).
- 459 36 Kressler, D. *et al.* Synchronizing nuclear import of ribosomal proteins with ribosome  
460 assembly. *Science* **338**, 666-671, doi:10.1126/science.1226960 (2012).
- 461 37 Teng, T., Mercer, C. A., Hexley, P., Thomas, G. & Fumagalli, S. Loss of tumor suppressor  
462 RPL5/RPL11 does not induce cell cycle arrest but impedes proliferation due to reduced  
463 ribosome content and translation capacity. *Mol Cell Biol* **33**, 4660-4671,  
464 doi:10.1128/MCB.01174-13 (2013).
- 465 38 Rubbi, C. P. & Milner, J. Disruption of the nucleolus mediates stabilization of p53 in  
466 response to DNA damage and other stresses. *EMBO J* **22**, 6068-6077,  
467 doi:10.1093/emboj/cdg579 (2003).

- 468 39 van Sluis, M. & McStay, B. A localized nucleolar DNA damage response facilitates  
469 recruitment of the homology-directed repair machinery independent of cell cycle stage.  
470 *Genes Dev* **29**, 1151-1163, doi:10.1101/gad.260703.115 (2015).
- 471 40 Ajore, R. *et al.* Deletion of ribosomal protein genes is a common vulnerability in human  
472 cancer, especially in concert with TP53 mutations. *EMBO Mol Med* **9**, 498-507,  
473 doi:10.15252/emmm.201606660 (2017).
- 474 41 Fancello, L., Kampen, K. R., Hofman, I. J., Verbeeck, J. & De Keersmaecker, K. The  
475 ribosomal protein gene RPL5 is a haploinsufficient tumor suppressor in multiple cancer  
476 types. *Oncotarget* **8**, 14462-14478, doi:10.18632/oncotarget.14895 (2017).
- 477

## Hannan *et al* Fig. 1

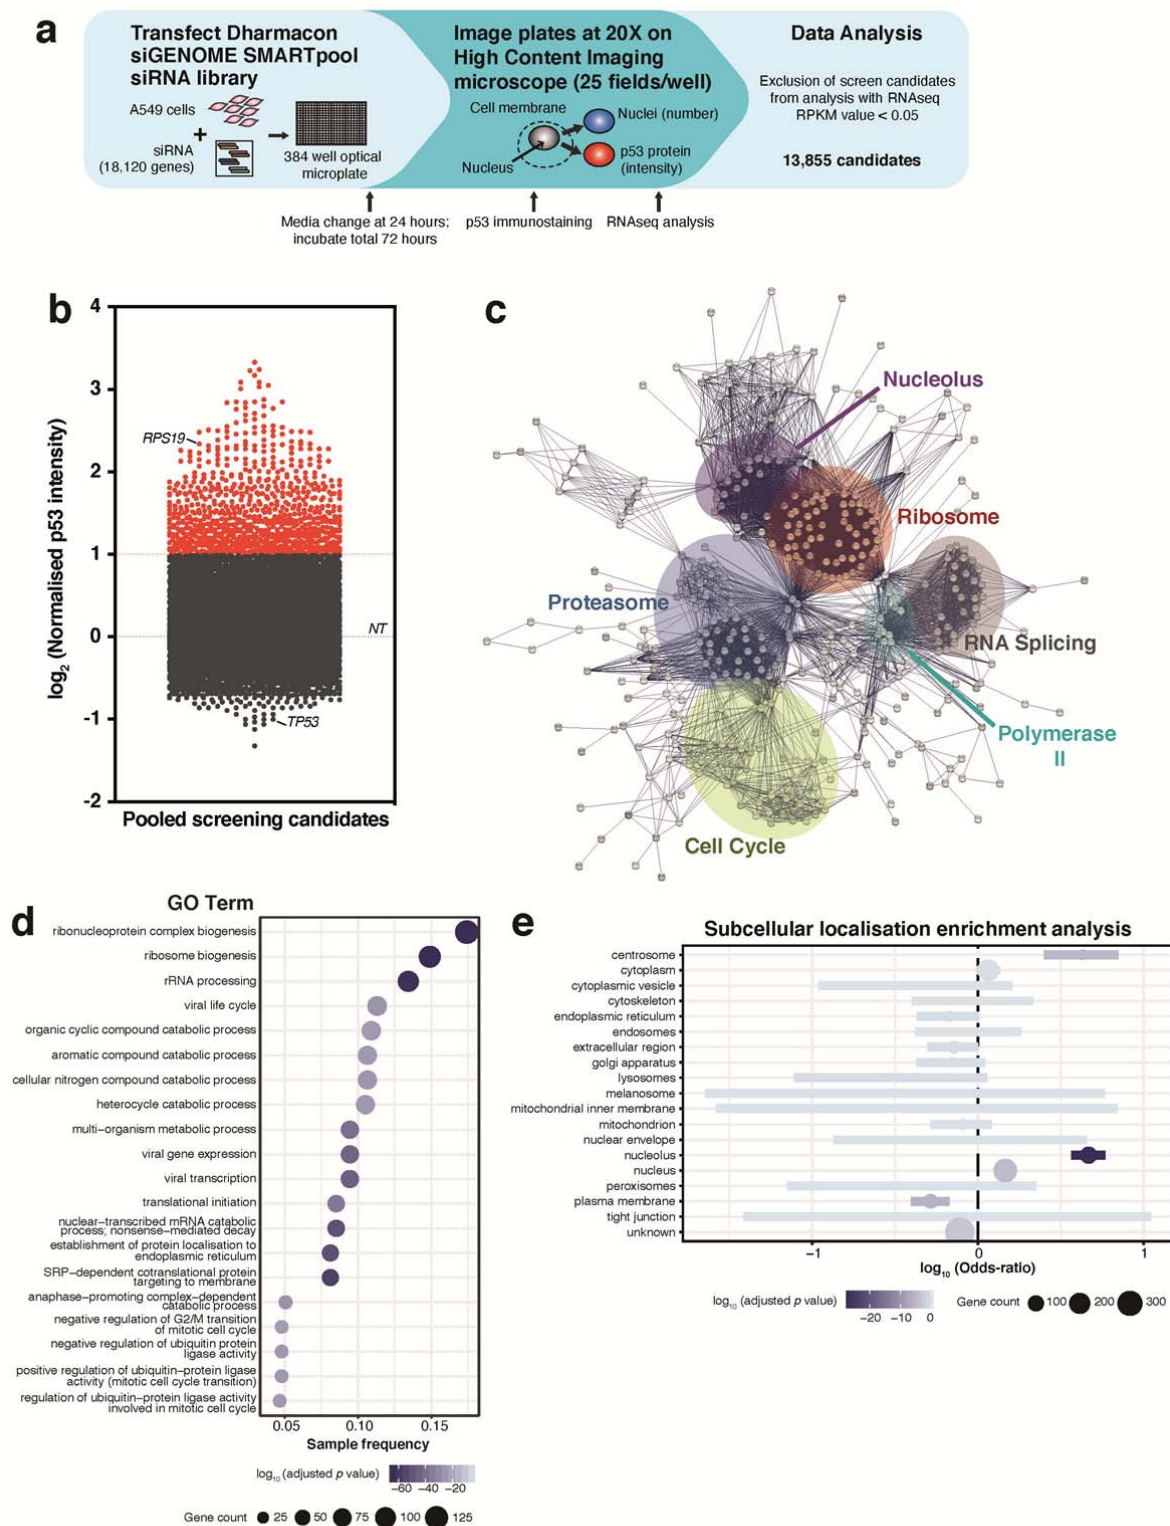

478

479

480

481

482 **Figure 1: A genome-wide high-throughput screen reveals ribosome biogenesis and the**

483 **nucleolus as central components for modulating p53 stabilisation.** Schematic of the genome-

484 wide high throughput screening approach in A549 (p53 wild-type) cells (**a**). A549 cells were

485 transfected with the genome-wide Dharmacon siGENOME SMARTpool siRNA library for 72

486 hours, then nuclear p53 intensity and cell number measured using an immunofluorescence-based

487 high-content (microscopy) imaging approach, with data normalised to non-targeting siRNA (NT)

488 transfected cells ('p53 stabilisation screen'). After intersection with RNAseq data from NT-

489 transfected cells (a cut-off of reads per kilobase per million, RPKM, of 0.05 or greater, to ensure

490 that candidates analysed are expressed in these cells), we determined the 'expressed' screening

491 candidates to be 13,855. The 'expressed' candidates are graphed in (**b**); the top candidates (coloured

492 in red) are those which were 2-fold or greater ( $\log_2 = 1$ ); 827 candidates in total. The top candidates

493 were then subjected to STRING (protein-protein interaction database) analysis using the KEGG

494 network enrichment analysis feature, and visualised in Cytoscape (described in Methods, **c**) to

495 identify clusters of similar proteins in the dataset (note: a fully annotated version of this figure is

496 located in Supplementary Figure 2A). Gene ontology (GO) analysis of the top candidates was then

497 performed, and simplified for graphical representation of the 'Biological Process' data using

498 ClusterProfiler (**d**, approach outlined in Methods), which depicts the gene ontologies versus the

499 gene ratio (ratio of number of query genes in the GO term and the total number of query genes).

500 Subcellular localisation enrichment analysis of the top candidates from the screen (using the

501 LOCATE database, **e**) was also performed; the  $\log_{10}$  odds-ratio (OR) reflects the amount of

502 enrichment/depletion ( $<0$  indicates under-representation,  $>0$  indicates over-representation of query

503 genes in the corresponding category). The coloured bars represent 95% confidence intervals.

504

505

506

507



## Hannan *et al* Fig. 2

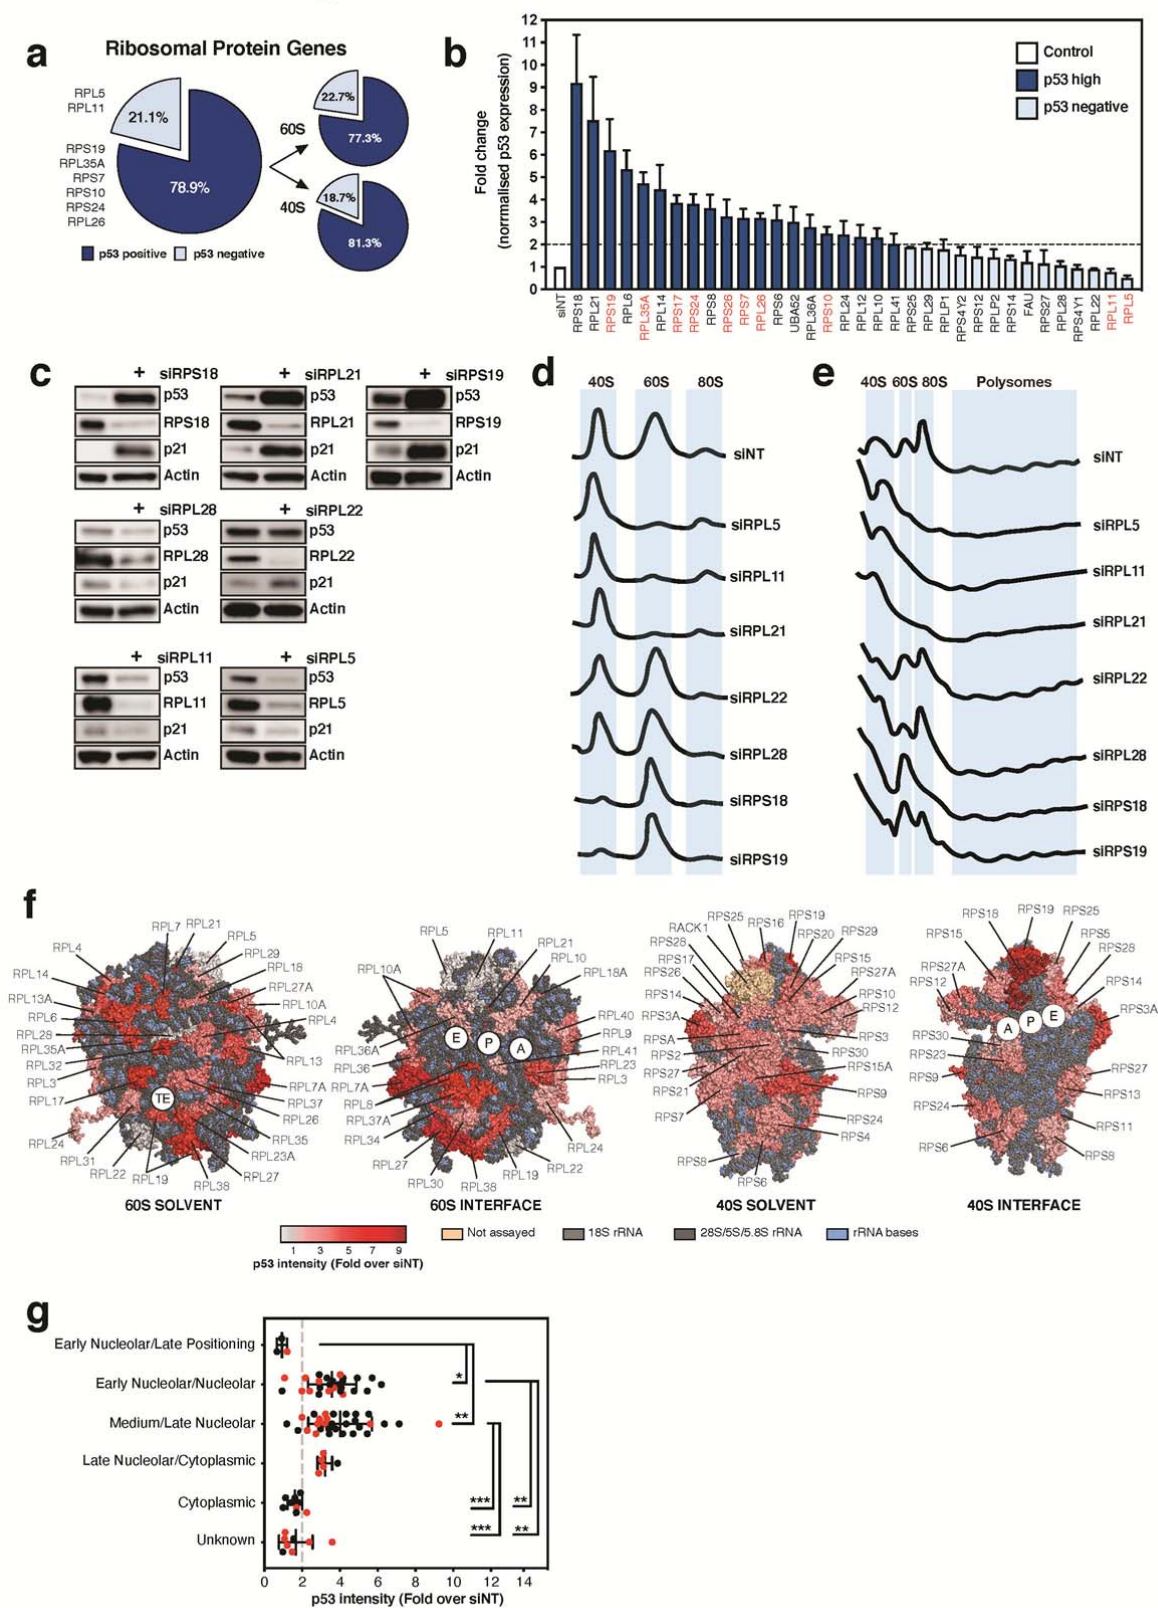

508

509



510 **Figure 2: Expression of most ribosomal protein genes are integral for maintaining cellular**  
511 **p53 homeostasis.** Given the enrichment of ribosomal protein (RP) genes in our primary screen  
512 dataset, we further investigated this group; depicted is the breakdown of screened RPs which were  
513 p53 ‘positive’ – 2-fold or greater increase in p53, and the proportion of which are located in the  
514 large (60S) or small (40S) ribosome subunit, shown in **(a)**. We further verified the p53 result of  
515 approximately 50% of the RP genes (when depleted using siRNAs for 72 hours) with quantitative  
516 p53 analysis (Alphascreen) in A549 cells (note genes associated with DBA are highlighted in red)  
517 **(b)**. We selected candidates which were ‘p53 positive’ (RPS18, RPL21, RPS19) and ‘p53 negative’  
518 (RPL5, RPL11, RPL22, RPL28) to confirm knockdown at the protein level, and determined p53  
519 and p21 protein levels using western blot analysis in A549 cells **(c)**, representative blot of n=3  
520 experiments). Cells depleted of each RP were then subjected to ribosome subunit analysis  
521 (performed under high salt conditions, **d**), to determine the effect of depletion on 60S and 40S  
522 subunits, as well as polysome analysis **(e)**. We rescreened the RP genes (to incorporate those which  
523 were not assayed in the primary screen into the dataset), and mapped the p53 intensity of each RP  
524 from the screen onto the near-atomic structure of the human ribosomal 60S and 40S subunits  
525 resolved by Khatter and colleagues (PDB ID: 4UG0)<sup>13</sup> **(f)**, to determine if there were any patterns or  
526 regions of the ribosome where p53 intensity was focused (TE = tunnel exit, A =  
527 acceptor/aminoacyl-tRNA site, P = peptidyl-tRNA site, E = exit site). Comparison of the timing of  
528 RP incorporation into the ribosome subunit (as tabulated by de la Cruz and colleagues<sup>14</sup>) with p53  
529 intensity when the RP was depleted using siRNA **(g)**. Data presented as mean +/- SD, statistical  
530 analysis: one-way ANOVA with Tukey’s multiple comparison test, \*\*\* $p < 0.001$ , \*\* $p < 0.01$ , \*  $p <$   
531  $0.05$ ; red circles indicate 40S subunit RPs, black circles indicate 60S subunit RPs. Alphascreen  
532 analysis performed n=3-5 biological experiments; ribosome subunit/polysome profiles, minimum  
533 n=3 biological experiments per candidate.

### Hannan *et al* Fig. 3

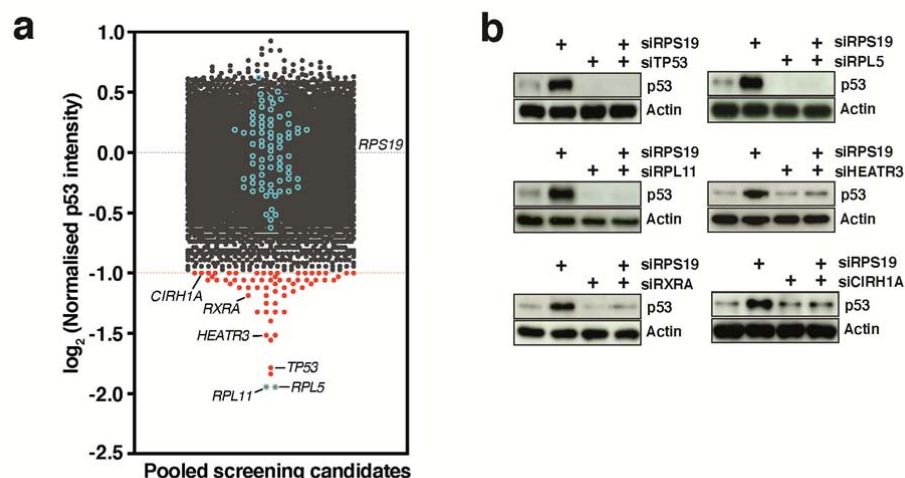

534

535 **Figure 3: High-throughput screening for modifiers of ribosomal stress due to activation of the**

536 **canonical nucleolar surveillance pathway (NSP).** In a similar approach (outlined in Fig. 1A), we

537 performed a genome-wide RNAi screen to identify modifiers of ribosomal stress, by co-depleting

538 RPS19 with every gene in the genome. After conducting the screen, candidates were further triaged

539 using gene-expression data from RNAseq analysis of A549 cells depleted of RPS19 (RPKM cutoff

540 of 0.05 or greater) to yield 14,577 ‘expressed’ screen candidates. The ‘expressed’ screen candidates

541 were then graphed normalised to RPS19 depletion (a); candidates in red are those with a log<sub>2</sub> value

542 of ≤ -1 (total 64 candidates). Ribosomal protein (RP) genes in the screening data are demarcated

543 with blue circles. A selection of these candidates (TP53, RPL5, RPL11, HEATR3, RXRA and

544 CIRH1A) were then further subjected to candidate-based validation in A549 cells (b); by co-

545 depletion of candidates with siRPS19 for 72 hours and analysed by western blotting (representative

546 of n=3 biological experiments).

547

548

## Hannan *et al* Fig. 4

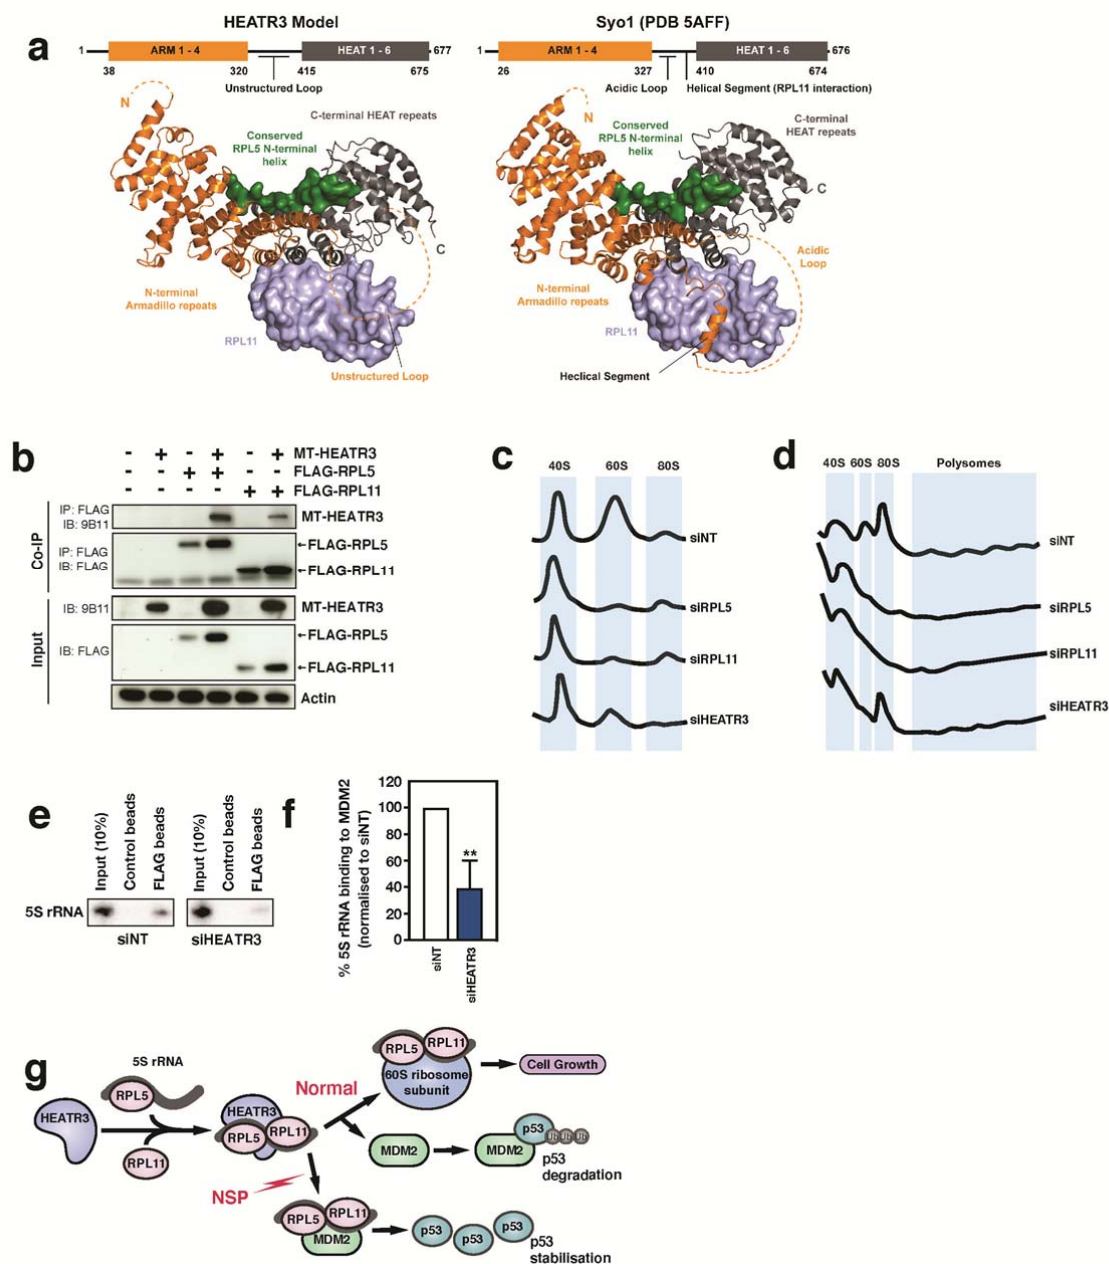

549

550

551 **Figure 4: Analysis of the HEAT-repeat containing 3 (HEATR3) protein and its role in**  
 552 **ribosome and 5S-RNP biogenesis.** Comparison between *C. thermophilum* Syo1 (ctSyo1) (PDB  
 553 5AFF)<sup>36</sup> and the predicted human HEATR3 structure (a). HEATR3 secondary structure and domain  
 554 modelling indicates the presence of an N-terminal Armadillo (ARM, orange), and a C-terminal

555 HEAT repeat domain (dark grey), similar to the yeast Symportin 1 (Syo1) protein. A domain  
556 schematic (to scale; top) and a cartoon model (bottom) are shown for each protein. Similar to the  
557 ctSyo1 protein, HEATR3 contains four N-terminal Armadillo (ARM) repeats and six C-terminal  
558 HEAT repeats. In the case for HEATR3, these regions are connected by a central, long and  
559 unstructured loop, whereas ctSyo1 has an acidic loop with a helical segment (Glu389 to Gly399)  
560 likely responsible, at least in part, for the binding of rpL11 (light blue, surface representation) to the  
561 protein<sup>35</sup>. A conserved N-terminal segment of RPL5 (green, surface representation) may also  
562 interact with HEATR3 (similar to Syo1). Co-immunoprecipitation (CoIP) analysis of human myc-  
563 tagged HEATR3 (MT-HEATR3) with FLAG-tagged human RPL5 and RPL11 proteins in HEK293  
564 cells **(b)**. Ribosome **(c)** and polysome **(d)** profiling analysis of A549 cells depleted of RPL5, RPL11  
565 or HEATR3 (and non-targeting siRNA, siNT) for 72 hours (note that the NT, RPL5 and RPL11  
566 data traces presented here are already presented in Fig 2d and e, and are replicated in this figure to  
567 directly compare the effect of HEATR3 depletion with these conditions). Northern blot analysis of  
568 the association of MDM2 with 5S rRNA after 48-hour HEATR3 depletion in U2OS cells  
569 expressing FLAG-MDM2 **(e)** and quantitation **(f)**. Schematic of the predicted role of HEATR3 in  
570 5S-RNP biogenesis (“Normal”) and the NSP **(g)**. Error bars represent SD and statistical analysis  
571 performed using unpaired student t-test (\*\*  $p < 0.01$ , n=3 experiments).

572

## Hannan *et al* Fig. 5

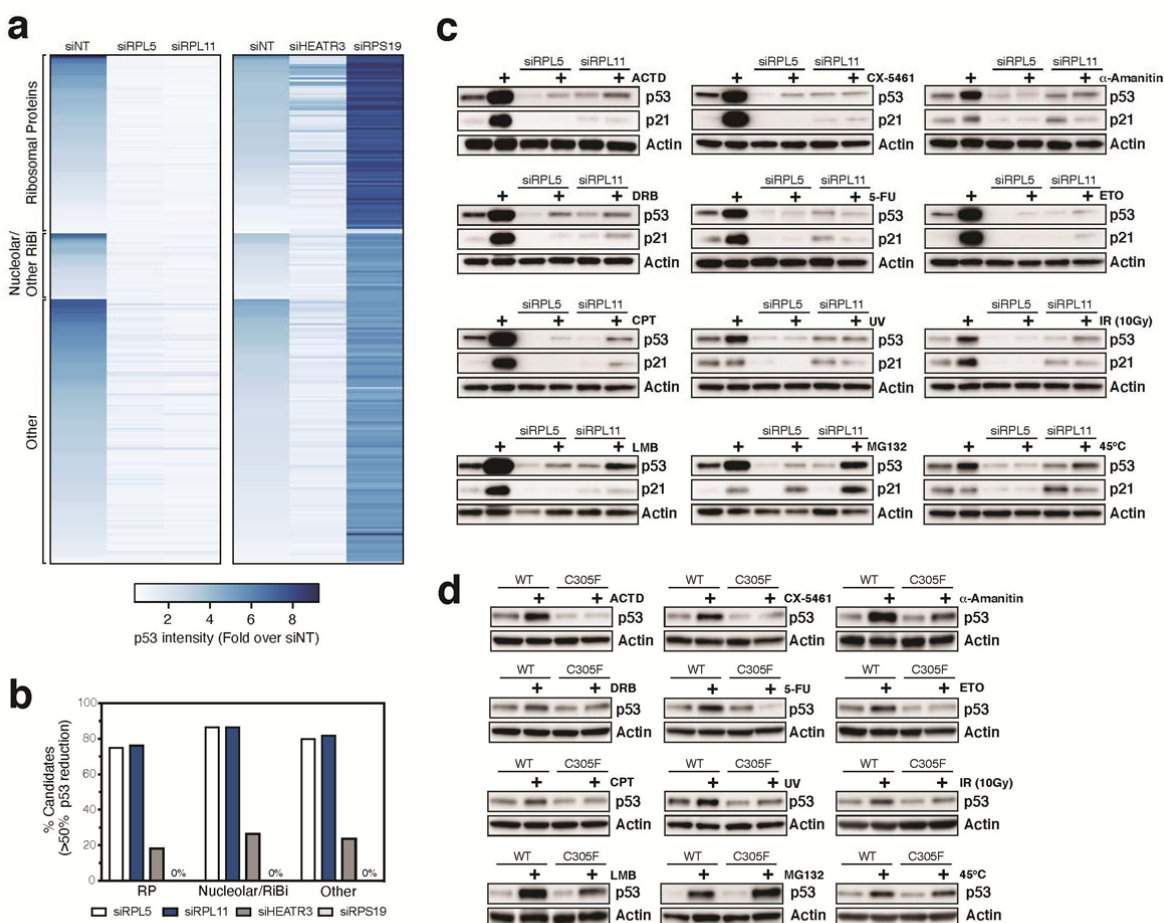

573

574

575 **Figure 5: The NSP, via RPL5 and RPL11, is required to stabilise p53 in response to broad**  
 576 **range of genetic, pharmacological and pathophysiological stresses.** To identify which candidate  
 577 genes are required for the canonical NSP, we rescreened a selection of candidates from the primary  
 578 p53 stabilisation screen described in Fig. 3 (ribosomal proteins, nucleolar/RiBi candidates and  
 579 “other” p53 positive candidates, 232 genes in total) in the presence of non-targeting, RPL5, RPL11,  
 580 HEATR3 or RPS19 siRNAs in A549 cells (**a**). From this analysis, we further quantified the number  
 581 of candidates screened from each group (ribosomal proteins, nucleolar/RiBi and other) for which  
 582 their p53 response could be suppressed by  $\geq 50\%$  when co-depleted with RPL5, RPL11, HEATR3  
 583 or RPS19 siRNAs (**b**). We further tested a panel of pharmacological agents and pathophysiological

584 stressors when A549 cells were depleted of RPL5 and RPL11 for 48 hours. Cells were treated for  
585 24 hours with pharmacological agents Actinomycin D (ACTD, 5 nM),  $\alpha$ -Amanitin (2.5  $\mu$ M),  
586 Doxorubicin (DRB, 500 nM), 5-Fluoruracil (5-FU, 50  $\mu$ M), Etoposide (ETO, 50  $\mu$ M),  
587 Camptothecin (CPT, 50 nM), Leptomycin B (LMB, 10 ng/mL) or MG132 (10  $\mu$ M). Alternatively,  
588 cells were treated with pathophysiological stressors UV (50 J/m<sup>2</sup>), gamma irradiation (10Gy), or  
589 subjected to heat shock (45°C, 30 minutes), then incubated at 37°C for 3 hours post treatment. At  
590 the end of treatment, protein was harvested and subjected to western blot analysis for p53 and p21  
591 protein expression (**c**). The same panel of stressors (and treatment conditions) were testing on  
592 mouse embryonic fibroblasts (MEFs) isolated from either Mdm2 wild-type (WT) or mice  
593 homozygous for the Mdm2 C305F mutation (C305F) to determine p53 expression (**d**). n=3-4  
594 biological replicates for each condition, the most representative experiment for each treatment is  
595 presented.

596

597

598
